# Supplementary material
Source: PubMed Central journal article supplement (PMC4957525)
Supplement: NIHMS802496-supplement-Supporting_Information.pdf [file NIHMS802496-supplement-Supporting_Information.pdf]

# Supporting Information

## Scaling up Nature — Large Area Flexible Biomimetic Surfaces

*Yinyong Li,<sup>†</sup> Jacob John,<sup>†</sup> Kristopher W. Kolewe,<sup>‡</sup> Jessica D. Schiffman,<sup>‡</sup> and  
Kenneth R. Carter<sup>\*,†</sup>*

<sup>†</sup>Department of Polymer Science and Engineering, University of Massachusetts –  
Amherst, Massachusetts, United States

<sup>‡</sup>Department of Chemical Engineering, University of Massachusetts – Amherst,  
Massachusetts, 01003, United States

Corresponding Author: \*E-mail: [kr Carter@polysci.umass.edu](mailto:kr Carter@polysci.umass.edu).

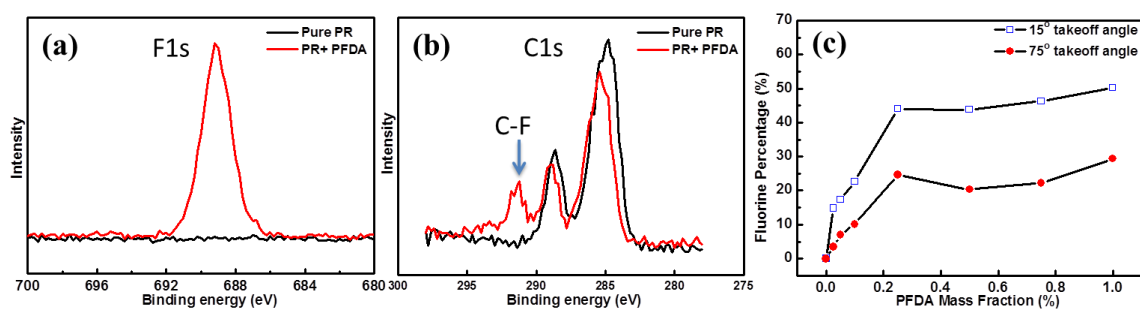

**Figure S1.** (a) and (b) XPS spectra of pure PR and PR with 1wt.% PFDA. (c) XPS analysis of surface fluorine percentage as a function of PFDA mass fraction. Open square: 15° takeoff angle; solid circle: 75° takeoff angle.

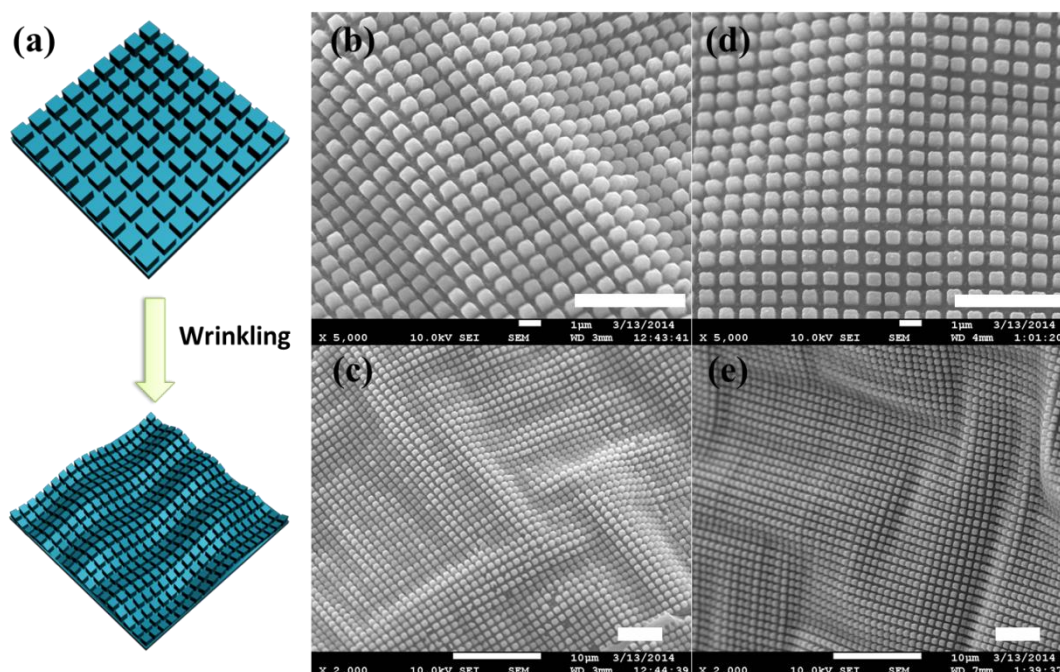

**Figure S2.** (a) Schematics of the formation of hierarchical wrinkle; (b) and (c) SEM images of hierarchically wrinkled structures on master mold; (d) and (e) SEM images of R2R imprinted patterns on PET. Scale bar: 5  $\mu\text{m}$ .

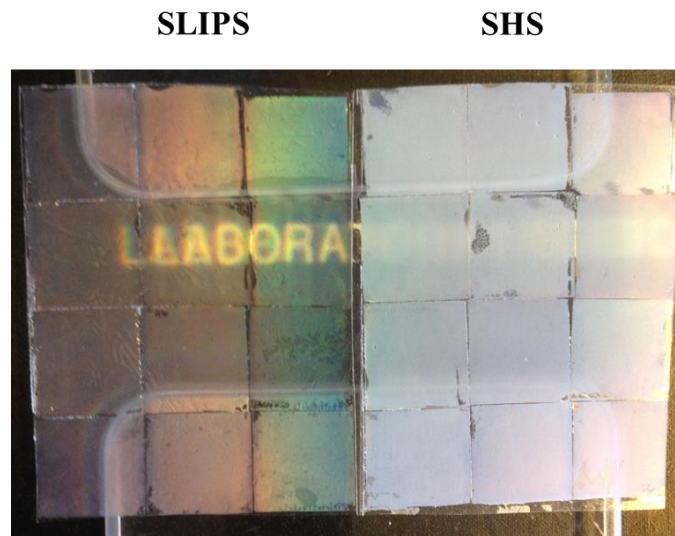

**Figure S3.** Optical transparency enhancement of SLIPS (left) as compared with SHS.

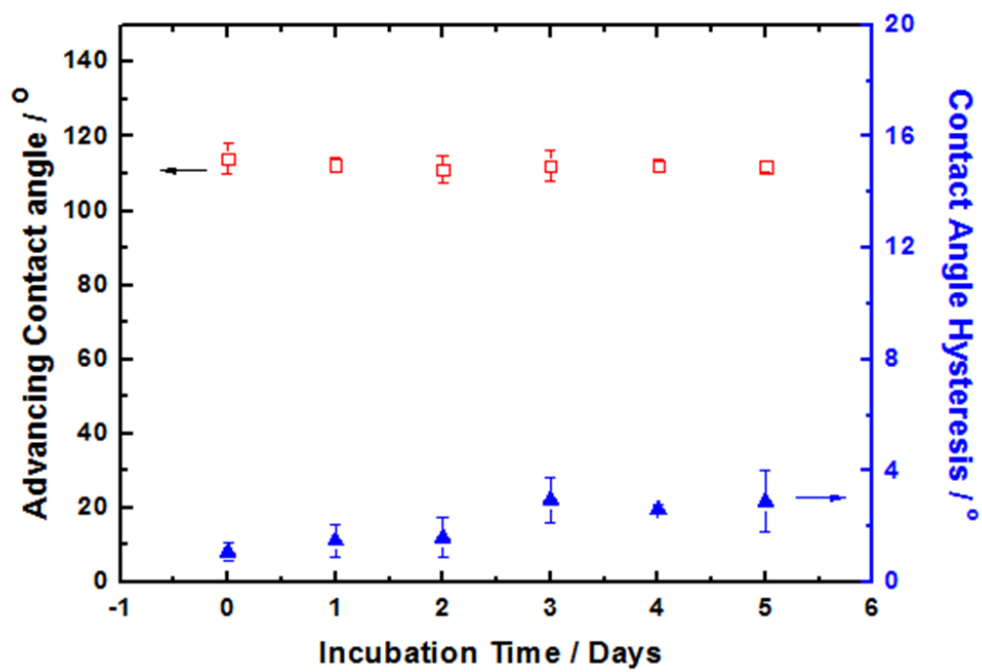

**Figure S4.** Water advancing contact angles and contact angle hysteresis of SLIPS as a function of incubation time in growth media (M9 minimal media).

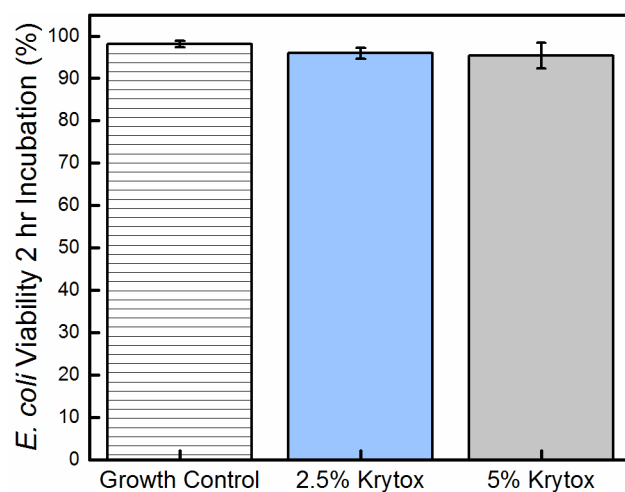

**Figure S5.** The assessment of cytotoxicity of the lubricant. The cytotoxicity of Krytox was assessed through standard Live/Dead staining of bacteria in solution. *E. coli* was incubated in growth media (M9 minimal media) containing the lubricant (2.5% and 5%) for 2 hr at 37°C. Viability of *E. coli* was >95% under tested conditions, indicating that Krytox is not cytotoxic.
